# Supplementary material
Source: PubMed Central journal article supplement (PMC4203500)
Supplement: psb-9-e29401-s01.pdf [file psb-9-e29401-s01.pdf]

## **Supplemental Material to:**

**Luis Alfredo Bañuelos Vazquez, Rosana Sanchez-Lopez,  
Alejandra Hernandez-Barrera, Isaac Zepeda-Jazo, Federico  
Sánchez, Carmen Quinto, and Luis Cárdenas Torres\***

**Actin polymerization drives polar growth  
in *Arabidopsis* root hair cells**

**Plant Signaling & Behavior 2014; 9  
<http://dx.doi.org/10.4161/psb.29401>**

**[www.landesbioscience.com/journals/psb/article/29401](http://www.landesbioscience.com/journals/psb/article/29401)**

**Supplemental Video 1.** Fluorescently labeled cytochalasin depict actin foci that localize at the tip region and experiment a dynamic behavior. Images in the sequence were subjected to low filtering with the methamorph/methafluor option. Images were taken 3 sec apart and movie speed has been increased 20X.

**Supplemental Video 2.** The highest fluorescent signal localize at the tip dome of the root hair cell. The fluorescent images were subjected to near neighbor deconvolution analysis in the methamorph/methafluor option. Images were taken 3 sec apart and movie speed has been increased 20X.
